# Supplementary material
Source: bioRxiv or medRxiv preprint supplement (https://www.biorxiv.org/highwire/filestream/140878/field_highwire_adjunct_files/3/470393-4.pdf)
Supplement: Supplementary file [file 470393-4.pdf]

**Table 4 – FRAP stat table**

| Sheet | Comment                                                              |
|-------|----------------------------------------------------------------------|
| TUBB3 | Row stat and p-value related to all TUBB3 FRAP experiment (FIG 8B-E) |
| APP   | Row stat and p-value related to APP FRAP experiment (FIG 8F)         |
| THBS1 | Row stat and p-value related to all THBS1 FRAP experiment (FIG 8F)   |
| ACTB  | Row stat and p-value related to all ACTB FRAP experiment (FIG 8SB)   |

**Legend**

|     |                                                                                                         |
|-----|---------------------------------------------------------------------------------------------------------|
| SEM | Standard error of the mean (based on the number of the single axons FRAP per experiment)                |
| N   | Number of the single axons FRAP per experiment                                                          |
| CHX | Cyclohexamide (used to block translation)                                                               |
|     | not significant p-value (stat test: non linear regression (one phase decay) extra sum-of-square F test) |
|     | significant p-value (stat test: non linear regression (one phase decay) extra sum-of-square F test)     |

**Figure 8B** FRAP on TUBB3 ex vivo wt, mut, Sema3A

| Row stat (TUBB3 ex vivo) |          |           |    |                   |           |    |           |         |    |                    |         |    |         |         |                        |         |         |    |
|--------------------------|----------|-----------|----|-------------------|-----------|----|-----------|---------|----|--------------------|---------|----|---------|---------|------------------------|---------|---------|----|
| Time (min)               | TUBB3 wt |           |    | TUBB3 wt + Sema3A |           |    | TUBB3 mut |         |    | TUBB3 mut + Sema3A |         |    | no UTR  |         | TUBB3 mut + Sema3A+CHX |         |         |    |
|                          | Mean     | SEM       | N  | Mean              | SEM       | N  | Mean      | SEM     | N  | Mean               | SEM     | N  | Mean    | SEM     | N                      | Mean    | SEM     | N  |
| 0                        | 0        | 0         | 13 | 0                 | 0         | 13 | 0         | 0       | 14 | 0                  | 0       | 13 | 0       | 0       | 12                     | 0       | 0       | 12 |
| 1                        | 2.50592  | 0.4012613 | 13 | 1.446142          | 0.2745405 | 13 | 2.33751   | 0.32876 | 13 | 3.0218             | 0.62833 | 13 | 2.67979 | 0.65681 | 12                     | 2.1405  | 0.79195 | 11 |
| 2                        | 6.13285  | 0.9911861 | 13 | 3.300992          | 0.5570537 | 13 | 5.84861   | 0.46448 | 14 | 6.4668             | 1.14752 | 13 | 4.71989 | 1.08992 | 12                     | 4.26886 | 1.03421 | 12 |
| 3                        | 8.81221  | 1.256961  | 13 | 4.916978          | 0.8284875 | 13 | 9.40548   | 0.8229  | 14 | 9.24004            | 1.51246 | 13 | 6.17856 | 1.14342 | 12                     | 6.04311 | 1.24732 | 12 |
| 4                        | 11.0612  | 1.529498  | 13 | 6.826206          | 1.025047  | 13 | 12.1202   | 1.0693  | 14 | 12.3538            | 1.99995 | 13 | 7.46503 | 1.16098 | 12                     | 7.47277 | 1.30096 | 12 |
| 5                        | 13.1305  | 1.514512  | 13 | 7.988617          | 1.145495  | 13 | 15.0308   | 1.39078 | 14 | 14.9151            | 2.39579 | 13 | 8.5065  | 1.18185 | 12                     | 9.22024 | 1.51615 | 12 |
| 6                        | 15.0876  | 1.815403  | 13 | 9.514845          | 1.50486   | 13 | 16.7216   | 1.60893 | 14 | 17.851             | 3.21942 | 13 | 9.65821 | 1.17684 | 12                     | 10.9307 | 1.75259 | 12 |
| 7                        | 16.9455  | 1.973082  | 13 | 10.1569           | 1.559974  | 13 | 19.32     | 1.82176 | 14 | 19.0347            | 3.18118 | 13 | 10.7333 | 1.19621 | 12                     | 11.8471 | 1.80548 | 12 |
| 8                        | 18.4625  | 2.068384  | 13 | 11.14339          | 1.757085  | 13 | 21.6267   | 2.16088 | 14 | 20.594             | 3.22487 | 13 | 11.4387 | 1.16719 | 12                     | 12.9442 | 1.86438 | 12 |
| 9                        | 19.9846  | 2.078886  | 13 | 11.8431           | 1.770227  | 13 | 23.1127   | 2.37017 | 14 | 22.0621            | 3.20439 | 12 | 12.2498 | 1.17269 | 12                     | 13.9739 | 1.87017 | 12 |
| 10                       | 21.8549  | 2.309156  | 13 | 12.31905          | 1.809778  | 13 | 24.1384   | 2.23368 | 14 | 23.1503            | 3.08075 | 12 | 13.2423 | 1.21663 | 12                     | 14.7743 | 1.78562 | 12 |

**p-values in summary**

|                          | TUBB3 wt | TUBB3 wt + Sema3A | TUBB3 mut | TUBB3 mut + Sema3A | TUBB3 mut + Sema3A + CHX | no UTR  |
|--------------------------|----------|-------------------|-----------|--------------------|--------------------------|---------|
| TUBB3 wt                 | X        | <0.0001           | 0.0514    | 0.3533             | <0.0001                  | <0.0001 |
| TUBB3 wt + Sema3A        |          | X                 | <0.0001   | <0.0001            | 0.0934                   | 0.5749  |
| TUBB3 mut                |          |                   | X         | 0.9393             | <0.0001                  | <0.0001 |
| TUBB3 mut + Sema3A       |          |                   |           | X                  | <0.0001                  | <0.0001 |
| TUBB3 mut + Sema3A + CHX |          |                   |           |                    | X                        | 0.3343  |
| no UTR                   |          |                   |           |                    |                          | X       |

**Figure 8C** FRAP on TUBB3 ex vivo isolated axons (with or without Sema3A)

| Row stat (TUBB3 ex vivo isolated axons) |                         |           |    |                                  |           |    |
|-----------------------------------------|-------------------------|-----------|----|----------------------------------|-----------|----|
| Time (min)                              | TUBB3 mut - isolated ax |           |    | TUBB3 mut + Sema3A - isolated ax |           |    |
|                                         | Mean                    | SEM       | N  | Mean                             | SEM       | N  |
| 0                                       | 0                       | 0         | 12 | 0                                | 0         | 13 |
| 1                                       | 4.51123                 | 0.7153731 | 11 | 3.54234                          | 0.7032316 | 13 |
| 2                                       | 9.25706                 | 1.29706   | 12 | 7.189637                         | 1.327873  | 13 |
| 3                                       | 13.1272                 | 1.853204  | 12 | 10.40648                         | 1.872004  | 13 |
| 4                                       | 14.9668                 | 2.136281  | 12 | 13.3078                          | 2.633621  | 13 |
| 5                                       | 17.9374                 | 2.599054  | 12 | 15.15231                         | 2.928984  | 13 |
| 6                                       | 18.9113                 | 3.096876  | 12 | 16.8469                          | 3.17298   | 13 |
| 7                                       | 21.0354                 | 3.15222   | 12 | 18.56586                         | 4.03555   | 12 |
| 8                                       | 22.2837                 | 3.247731  | 12 | 20.30212                         | 4.546017  | 12 |
| 9                                       | 23.1159                 | 3.577128  | 12 | 22.07575                         | 5.734881  | 11 |
| 10                                      | 23.9057                 | 3.659397  | 12 | 22.5225                          | 5.829574  | 11 |

**p-values in summary**

|                                 |        |
|---------------------------------|--------|
| TUBB3 mut vs TUBB3 mut + Sema3A | 0.5053 |
|---------------------------------|--------|

**Figure 8D** FRAP on TUBB3 ex vivo co-MO vs MO isolated axons

| Row stat (TUBB3 ex vivo co-MO and MO isolated axons) |                    |          |    |                 |          |    |
|------------------------------------------------------|--------------------|----------|----|-----------------|----------|----|
| Time (min)                                           | TUBB3_co-MO_Sema3A |          |    | TUBB3_MO_Sema3A |          |    |
|                                                      | Mean               | SEM      | N  | Mean            | SEM      | N  |
| 0                                                    | 0                  | 0        | 14 | 0               | 0        | 16 |
| 1                                                    | 4.59781            | 1.07317  | 14 | 6.64088         | 0.965031 | 16 |
| 2                                                    | 7.44063            | 1.368251 | 14 | 12.30703        | 1.922383 | 16 |
| 3                                                    | 9.4997             | 1.442414 | 14 | 16.22865        | 2.614181 | 16 |
| 4                                                    | 10.349             | 1.607571 | 14 | 18.71679        | 3.020975 | 16 |
| 5                                                    | 11.333             | 1.79889  | 14 | 21.44941        | 3.649506 | 16 |
| 6                                                    | 11.8003            | 1.982891 | 14 | 23.25229        | 3.823252 | 16 |
| 7                                                    | 12.217             | 1.914643 | 14 | 24.24964        | 4.055425 | 16 |
| 8                                                    | 12.2897            | 1.97432  | 14 | 25.48059        | 4.434817 | 16 |
| 9                                                    | 13.3874            | 2.263137 | 13 | 25.66678        | 4.602938 | 14 |
| 10                                                   | 12.982             | 2.165362 | 13 | 26.1972         | 4.817541 | 14 |

p-values in summary

|                                                |          |
|------------------------------------------------|----------|
| TUBB3 co-MO<br>Sema3A vs<br>TUBB3 MO<br>Sema3A | < 0.0001 |
|------------------------------------------------|----------|

Figure 8E FRAP on TUBB3 in vivo

Row stat (TUBB3 in vivo)

| Time (min) | TUBB3 wt |          |    | TUBB3 mut |          |    | no UTR  |         |   |
|------------|----------|----------|----|-----------|----------|----|---------|---------|---|
|            | Mean     | SEM      | N  | Mean      | SEM      | N  | Mean    | SEM     | N |
| 0          | 0        | 0        | 13 | 0         | 0        | 14 | 0       | 0       | 9 |
| 1          | 8.84175  | 2.096109 | 13 | 10.50249  | 1.738892 | 13 | 5.4729  | 1.03033 | 9 |
| 2          | 13.3824  | 1.693376 | 13 | 15.60584  | 1.948999 | 14 | 9.90023 | 1.37042 | 9 |
| 3          | 17.4597  | 1.886495 | 13 | 19.88032  | 2.665493 | 14 | 11.5084 | 1.45658 | 9 |
| 4          | 19.883   | 1.94056  | 13 | 23.72907  | 2.411433 | 14 | 14.3376 | 1.94064 | 8 |
| 5          | 21.0749  | 2.295186 | 13 | 23.1803   | 2.538608 | 14 | 14.9161 | 1.87033 | 9 |
| 6          | 21.5764  | 2.424325 | 13 | 25.67823  | 2.720879 | 14 | 15.7376 | 2.13055 | 9 |
| 7          | 25.2002  | 2.020976 | 13 | 29.50884  | 3.126867 | 13 | 15.0209 | 2.3255  | 9 |
| 8          | 26.7382  | 2.491745 | 13 | 29.82323  | 3.457293 | 14 | 14.8078 | 3.18307 | 9 |
| 9          | 25.124   | 2.787736 | 13 | 30.73869  | 2.977951 | 13 | 15.495  | 2.95481 | 9 |
| 10         | 24.1259  | 2.958345 | 13 | 30.71744  | 3.232704 | 14 | 15.0698 | 2.35701 | 8 |

p-values in summary

|                                     |          |
|-------------------------------------|----------|
| TUBB3 wt vs<br>TUBB3 mut in<br>vivo | 0.005    |
| TUBB3 mut vs no<br>UTR              | < 0.0001 |
| TUBB3 wt vs no<br>UTR               | < 0.0001 |

Figure 8F FRAP on APP ex vivo wt, mut, Sema3A

Row stat (APP ex vivo)

| Time (min) | APP wt  |           |    | APP wt + Sema3A |           |    | APP mut |         |    | APP mut + Sema3A |         |    |
|------------|---------|-----------|----|-----------------|-----------|----|---------|---------|----|------------------|---------|----|
|            | Mean    | SEM       | N  | Mean            | SEM       | N  | Mean    | SEM     | N  | Mean             | SEM     | N  |
| 0          | 0       | 0         | 13 | 0               | 0         | 13 | 0       | 0       | 13 | 0                | 0       | 13 |
| 1          | 3.06499 | 0.5546552 | 13 | 2.013558        | 0.3798081 | 10 | 2.59412 | 0.4422  | 13 | 1.58939          | 0.236   | 12 |
| 2          | 6.22268 | 0.8908166 | 13 | 5.431235        | 1.828498  | 12 | 5.9503  | 0.84332 | 13 | 3.77145          | 0.55665 | 12 |
| 3          | 8.7181  | 1.057341  | 13 | 6.878763        | 1.926334  | 13 | 8.75697 | 1.08959 | 13 | 5.46668          | 0.84118 | 13 |
| 4          | 11.2905 | 1.45505   | 13 | 8.311195        | 2.171235  | 13 | 11.2054 | 1.24287 | 13 | 6.67045          | 1.00075 | 13 |
| 5          | 13.3784 | 1.660904  | 13 | 9.544214        | 2.198201  | 13 | 13.4674 | 1.50908 | 13 | 7.8063           | 1.13829 | 13 |
| 6          | 14.8401 | 1.777831  | 13 | 10.7862         | 2.380333  | 13 | 15.3657 | 1.48099 | 13 | 9.10498          | 1.34296 | 13 |
| 7          | 16.8546 | 1.992732  | 13 | 11.74579        | 2.386151  | 13 | 16.808  | 1.77214 | 13 | 9.60796          | 1.115   | 13 |
| 8          | 18.2196 | 2.026422  | 13 | 12.28008        | 2.379899  | 13 | 18.6268 | 1.78968 | 13 | 10.8989          | 1.61362 | 13 |
| 9          | 20.282  | 2.295962  | 13 | 12.59671        | 2.169909  | 13 | 20.199  | 1.82439 | 13 | 11.7844          | 1.69851 | 13 |
| 10         | 21.4707 | 2.354713  | 13 | 13.19894        | 2.252368  | 13 | 21.6488 | 1.89524 | 13 | 12.7405          | 1.86603 | 13 |

p-values in summary

|                  |        |                 |          |                  |
|------------------|--------|-----------------|----------|------------------|
|                  | APP wt | APP wt + Sema3A | APP mut  | APP mut + Sema3A |
| APP wt           | X      | < 0.0001        | 0.9964   | < 0.0001         |
| APP wt + Sema3A  |        | X               | < 0.0001 | 0.2761           |
| APP mut          |        |                 | X        | < 0.0001         |
| APP mut + Sema3A |        |                 |          | X                |

Figure 8G FRAP on THBS1 ex vivo wt, mut, Sema3A

Row stat (THBS1 ex vivo)

| Time (min) | THBS1 wt |           |    | THBS1 wt + Sema3A |           |    | THBS1 mut |         |    | THBS1 mut + Sema3A |         |    |
|------------|----------|-----------|----|-------------------|-----------|----|-----------|---------|----|--------------------|---------|----|
|            | Mean     | SEM       | N  | Mean              | SEM       | N  | Mean      | SEM     | N  | Mean               | SEM     | N  |
| 0          | 0        | 0         | 11 | 0                 | 0         | 11 | 0         | 0       | 11 | 0                  | 0       | 11 |
| 1          | 1.4887   | 0.4056773 | 11 | 1.283874          | 0.3060505 | 11 | 1.3148    | 0.38742 | 9  | 1.43836            | 0.28673 | 11 |
| 2          | 3.35334  | 0.8308482 | 11 | 3.308103          | 0.5122092 | 11 | 2.96796   | 0.73881 | 10 | 3.20101            | 0.64298 | 11 |
| 3          | 4.69851  | 1.020154  | 11 | 4.739583          | 0.7240555 | 11 | 4.03707   | 0.887   | 11 | 4.78531            | 0.81156 | 11 |
| 4          | 5.78901  | 1.0697    | 11 | 6.030899          | 0.9836724 | 11 | 5.25187   | 1.11819 | 11 | 6.05334            | 1.00019 | 11 |
| 5          | 6.78695  | 1.177381  | 11 | 6.933337          | 1.11027   | 11 | 6.93433   | 1.43315 | 11 | 7.42004            | 1.15918 | 11 |
| 6          | 7.58698  | 1.153931  | 11 | 7.92713           | 1.264883  | 11 | 8.27696   | 2.02141 | 11 | 8.40159            | 1.2521  | 11 |
| 7          | 8.64252  | 1.297878  | 11 | 8.874183          | 1.567088  | 11 | 8.90699   | 1.9376  | 11 | 8.80566            | 1.2844  | 11 |
| 8          | 9.20658  | 1.368006  | 11 | 10.26145          | 1.738127  | 10 | 9.67092   | 1.96423 | 11 | 9.76673            | 1.56158 | 11 |
| 9          | 9.7534   | 1.458212  | 11 | 10.5959           | 1.756881  | 10 | 10.7984   | 2.40897 | 11 | 10.1871            | 1.56256 | 11 |
| 10         | 9.98889  | 1.405221  | 11 | 11.54858          | 2.112967  | 10 | 11.0498   | 2.53158 | 11 | 11.1663            | 1.75533 | 11 |

p-values in summary

|                    |          |                   |           |                    |
|--------------------|----------|-------------------|-----------|--------------------|
|                    | THBS1 wt | THBS1 wt + Sema3A | THBS1 mut | THBS1 mut + Sema3A |
| THBS1 wt           | X        | 0.6645            | 0.8295    | 0.7958             |
| THBS1 wt + Sema3A  |          | X                 | 0.9884    | 0.9804             |
| THBS1 mut          |          |                   | X         | 0.9606             |
| THBS1 mut + Sema3A |          |                   |           | X                  |

Figure 8F FRAP on ACTB ex vivo wt

Row stat (ACTB ex vivo)

| Time (min) | Venus_ACTB |          |   | Venus_ACTB_CHX |           |   |
|------------|------------|----------|---|----------------|-----------|---|
|            | Mean       | SEM      | N | Mean           | SEM       | N |
| 0          | 0          | 0        | 9 | 0              | 0         | 9 |
| 1          | 8.85427    | 2.18773  | 9 | 5.441092       | 0.9026811 | 9 |
| 2          | 14.7127    | 3.133608 | 9 | 8.888219       | 1.167582  | 9 |
| 3          | 19.885     | 3.669384 | 9 | 12.14045       | 1.413548  | 9 |
| 4          | 23.5937    | 3.967617 | 9 | 14.96311       | 1.76993   | 9 |
| 5          | 26.7153    | 3.859723 | 9 | 17.5536        | 2.23044   | 9 |
| 6          | 28.4583    | 4.485406 | 9 | 18.46542       | 2.493013  | 9 |
| 7          | 30.9568    | 4.540555 | 9 | 19.42891       | 2.740475  | 9 |
| 8          | 35.3712    | 5.371607 | 9 | 20.69722       | 2.634823  | 9 |
| 9          | 38.278     | 5.975838 | 9 | 22.74909       | 2.610709  | 9 |

p-values in summary

ACTB vs ACTB +  
CHX < 0.0001
